# Supplementary material for: eDNA reveals the ecology and seasonal migration of a rare sturgeon species in the Ural River
Source: Research Square preprint supplement (doi:10.21203/rs.3.rs-3643693/v1), 2023-11-25
Supplement: Supplementary file 1 [file f8e24e1996bd90a1dceef5c5.docx]

**Supplementary Material**

**Supplemental Table S1.**Sampling locations of water collected for eDNA analysis in the Ural River.

| **Site No.** | **Site Description** | **Sample No.** | **Date** | **Collection Time (24 hr.)** | **Longitude** | **Latitude** | **Depth (m)** | **Water Temp (C)** | **Water Quantity Collected (L)** |
| --- | --- | --- | --- | --- | --- | --- | --- | --- | --- |
| 1 | Yanvartsevo | 1 | 22.04.2021 | 17.26 | 52.24153 | 51.43686 | 5.0 | 9.5 | 2 |
| 2 | Uralsk | 2 | 23.04.2021 | 12.12 | 51.43855 | 51.18256 | 7.5 | 9.1 | 2 |
| 3 | Kushum | 3 | 23.04.2021 | 14.32 | 51.13908 | 50.85957 | from shore | 8.6 | 2 |
| 4 | Hillocks | 4 | 24.04.2021 | 11.55 | 51.92639 | 47.1525 | 5.0 | 14.4 | 2 |
| 5 | Water Intake | 5 | 24.04.2021 | 12.15 | 51.92859 | 47.13135 | 15.9 | 16.8 | 2 |
| 6 | Institute | 6 | 24.04.2021 | 12.35 | 51.92108 | 47.11564 | 18.0 | 16.0 | 2 |
| 7 | Balykshy | 7 | 24.04.2021 | 13.10 | 51.87282 | 47.08717 | 10.1 | 14.0 | 2 |
| 8 | Lower Dam | 8 | 24.04.2021 | 13.50 | 51.77345 | 46.97501 | 5.3 | 14.5 | 2 |
| 9 | Seventh station | 9 | 24.04.2021 | 14.22 | 51.71702 | 46.94609 | 4.3 | 13.4 | 2 |
| 10 | Yanvartsevo | 1 | 19.07.2021 | 13.11 | 52.24763 | 51.43646 | 0.7 | 28.0 | 2 |
| 11 | Uralsk | 2 | 19.07.2021 | 15.13 | 51.44512 | 51.22189 | 0.5 | 28.0 | 2 |
| 12 | Kushum | 3 | 19.07.2021 | 16.33 | 51.14288 | 50.86411 | from shore | 28.0 | 2 |
| 13 | Hillocks | 4 | 20.07.2021 | 12.49 | 51.92556 | 47.15306 |  | 28.0 | 2 |
| 14 | Water Intake | 5 | 20.07.2021 | 13.19 | 51.92889 | 47.13028 |  | 28.0 | 2 |
| 15 | Institute | 6 | 20.07.2021 | 13.52 | 51.92222 | 47.11528 |  | 28.0 | 2 |
| 16 | Balykshy | 7 | 20.07.2021 | 14.12 | 51.87161 | 47.08155 |  | 28.0 | 2 |
| 17 | Lower Dam | 8 | 20.07.2021 | 14.25 | 51.77358 | 46.97496 |  | 28.0 | 2 |
| 18 | Seventh station | 9 | 20.07.2021 | 14.36 | 51.74156 | 46.95828 |  | 29.0 | 2 |
| 19 | Peshnoyskaya | 10 | 20.07.2021 | 14.52 | 51.65260 | 46.90733 |  | 29.0 | 2 |
| 20 | Yanvartsevo | 1 | 03.10.2021 | 15.51 | 52.24843 | 51.43624 | 3.5 | 11.0 | 2 |
| 21 | Uralsk | 2 | 03.10.2021 | 18.05 | 51.43133 | 51.21912 | 2.5 | 12.0 | 2 |
| 22 | Kushum | 3 | 03.10.2021 | 19.33 | 51.14285 | 50.86418 | from shore | 11.0 | 2 |
| 23 | Hillocks | 4 | 04.10.2021 | 12.16 | 51.92608 | 47.15345 |  | 13.5 | 2 |
| 24 | Water Intake | 5 | 04.10.2021 | 13.27 | 51.92919 | 47.13144 |  | 13.5 | 2 |
| 25 | Institute | 6 | 04.10.2021 | 13.42 | 51.91849 | 47.10801 |  | 13.5 | 2 |
| 26 | Balykshy | 7 | 04.10.2021 | 14.13 | 51.87183 | 47.08082 |  | 13.5 | 2 |
| 27 | Lower Dam | 8 | 04.10.2021 | 14.29 | 51.75183 | 46.96293 |  | 13.5 | 2 |
| 28 | Seventh station | 9 | 04.10.2021 | 14.47 | 51.72593 | 46.94997 |  | 13.5 | 2 |
| 29 | Peshnoyskaya | 10 | 04.10.2021 | 14.51 | 51.65114 | 46.90651 | 6.8 | 13.5 | 2 |

**Supplemental Table S2.** Efficiency of used DNA extraction protocols.

| **Protocol** | **Isolation Frequency (%)** | **Concentration, ng/µl** | **Purity, 260/230** |
| --- | --- | --- | --- |
| CTAB-NaCl | 70% | 10 - 35 | 1,6 - 2,0 |
| SDS-proteinase K | 100% | 20 – 63 | 1,2 - 1,9 |

**Supplemental Table S3.** Quantitative and qualitative characteristics of total genomic DNA samples isolated from river water samples.

| **Sample No** | **Total eDNA Concentration (ng/µl)** | **Value (A260/A230)** |
| --- | --- | --- |
| Summer water samples | | |
| 1.1 | 20,5 | 0,99 |
| 2.2 | 38,1 | 1,62 |
| 3.3 | 41,4 | 1,42 |
| 4.4 | 42,8 | 1,47 |
| 5.5 | 44,5 | 1,49 |
| 6.6 | 33,7 | 1,44 |
| 7.7 | 31,6 | 1,71 |
| 8.8 | 63,2 | 1,54 |
| 9.9 | 49,2 | 1,96 |
| 10.10 | 21,7 | 1,42 |
| Spring water samples | | |
| 1.1 | 11,1 | 0,7 |
| 2.2 | 6,8 | 1,25 |
| 3.3 | 10,67 | 0,65 |
| 4.4 | 60,1 | 1,42 |
| 5.5 | 12,2 | 1,2 |
| 6.6 | 17,0 | 0,99 |
| 7.7 | 2,2 | 1,36 |
| 8.8 | 0,6 | 0,78 |
| 9.9 | 9,8 | 1,34 |
| Autumn water samples | | |
| 1.1 | 10,43 | 0,37 |
| 2.2 | 10,14 | 1,73 |
| 3.3 | 5,49 | 1,32 |
| 4.4 | 10,57 | 0,64 |
| 5.5 | 20,47 | 1,41 |
| 6.6 | 11,31 | 1,24 |
| 7.7 | 11,16 | 1,33 |
| 8.8 | 12,42 | 1,47 |
| 9.9 | 14,8 | 1,43 |
| 10.10 | 10,6 | 0,98 |

**Protocol No 1. DNA extraction from the filter using CTAB solution**

1. In a 2 ml Eppendorf Safe-Lock microcentrifuge tube containing a piece of a cellulose nitrate membrane filter add 900 μl CTAB solution buffer (1.5% CTAB, 1.5 M NaCl, 10 mM Na3EDTA, 0.1 M HEPES), mix well in a vortex and incubate the samples at 65°C for 1 hour.
2. Add an equal volume of a mixture of chloroform:isoamyl alcohol (24:1, v/v) to the tube, and mix thoroughly by vortexing.
3. Spin at maximum speed in a microcentrifuge for 2 minutes, transferred the upper aqueous layer to a new 2 ml microcentrifuge tube which contains 800 μl 2-propanol, vortex well and centrifuge the tubes at maximum speed in a microcentrifuge for 2 minutes.
4. Discard supernatant and wash pellet by adding 1.8 ml 70% EtOH, vortex very well. Centrifuge at maximum speed for 2 min and discard ethanol.
5. The DNA pellet do not dry and dissolved immediately in 300 μl 1xTE, pH 8.0 at 55°C for 10 minutes.

**Protocol No 2. DNA extraction from the filter using SDS-proteinase K method**

1. In a 2 ml Eppendorf Safe-Lock microcentrifuge tube containing a piece of a cellulose nitrate membrane filter add 900 μl of SDS buffer (10 mM Tris-HCl, 100 mM EDTA, 200 mM NaCl, 1% SDS) and 10 µl of proteinase K (about 1 mg/ml, final concentration) to each tube with the filter and incubate at 55°C for 1 hour.
2. Add an equal volume of a mixture of chloroform:isoamyl alcohol (24:1, v/v) to the tube, and mix thoroughly by vortexing.
3. Spin at maximum speed in a microcentrifuge for 2 minutes, transferred the upper aqueous layer to a new 2 ml microcentrifuge tube which contains 800 μl 2-propanol and 100 µL of 10 M LiCl, vortex well and centrifuge the tubes at maximum speed in a microcentrifuge for 2 minutes.
4. Discard supernatant and wash pellet by adding 1.8 ml 70% EtOH, vortex very well. Centrifuge at maximum speed for 2 min and discard ethanol.
5. The DNA pellet do not dry and dissolved immediately in 300 μl 1xTE, pH 8.0 at 55°C for 10 minutes.

**
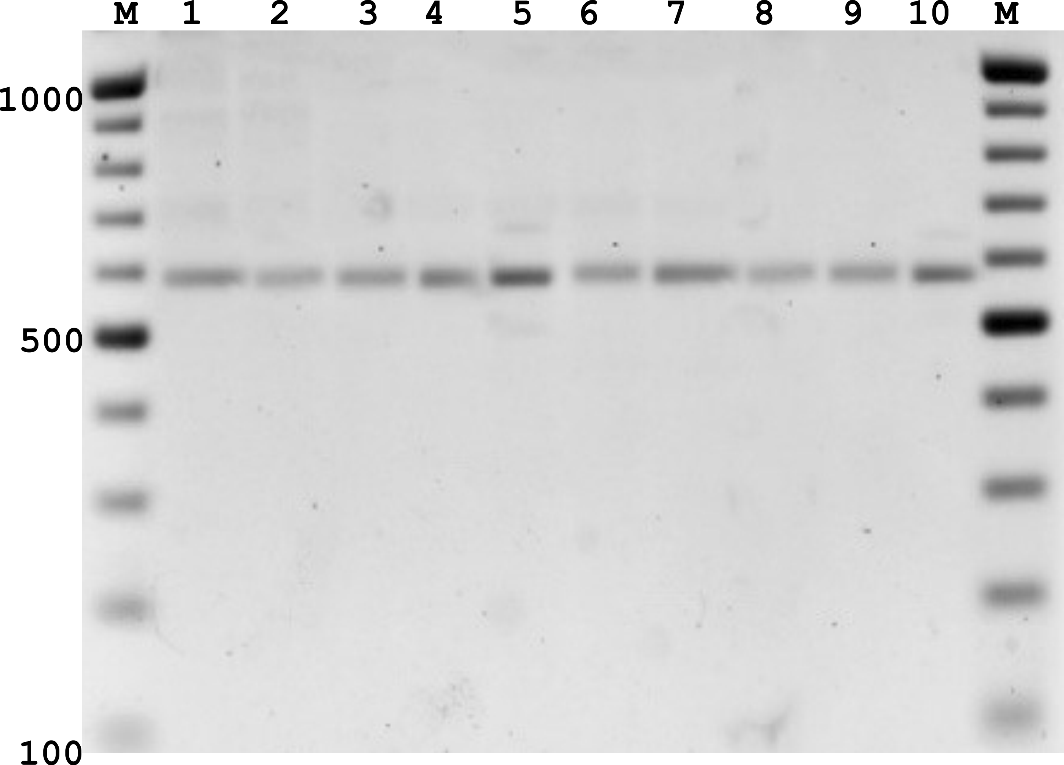
**

**Figure S1**. Amplification results of summer eDNA samples with ITS primers.

**
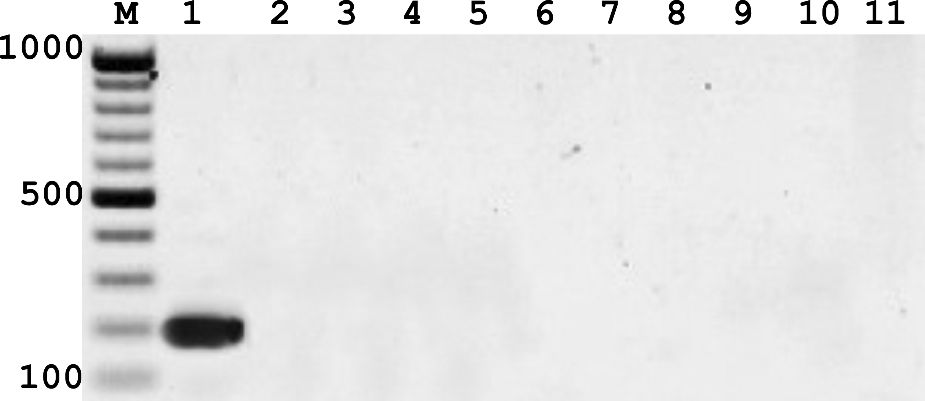
**

**Figure S2**. Amplification results of autumn (А) and spring (B) eDNA samples with ITS primers.


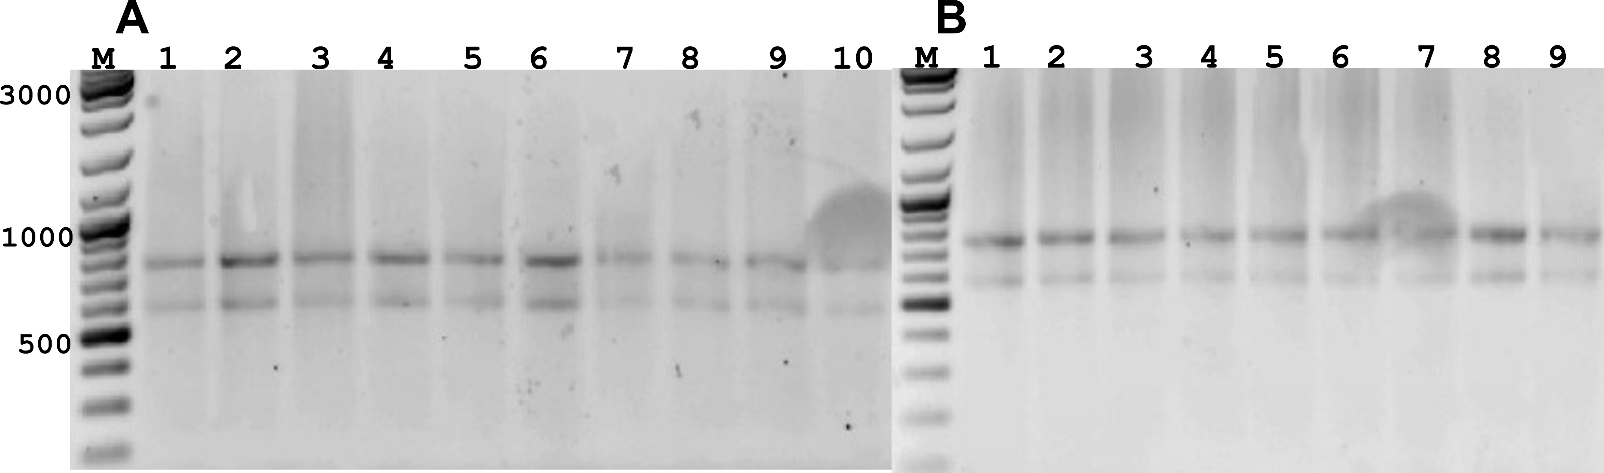


**Figure S3**. Amplification results of summer eDNA samples with genus-specific primers

(1: positive control of Russian sturgeon DNA; 2-11: eDNA).

**
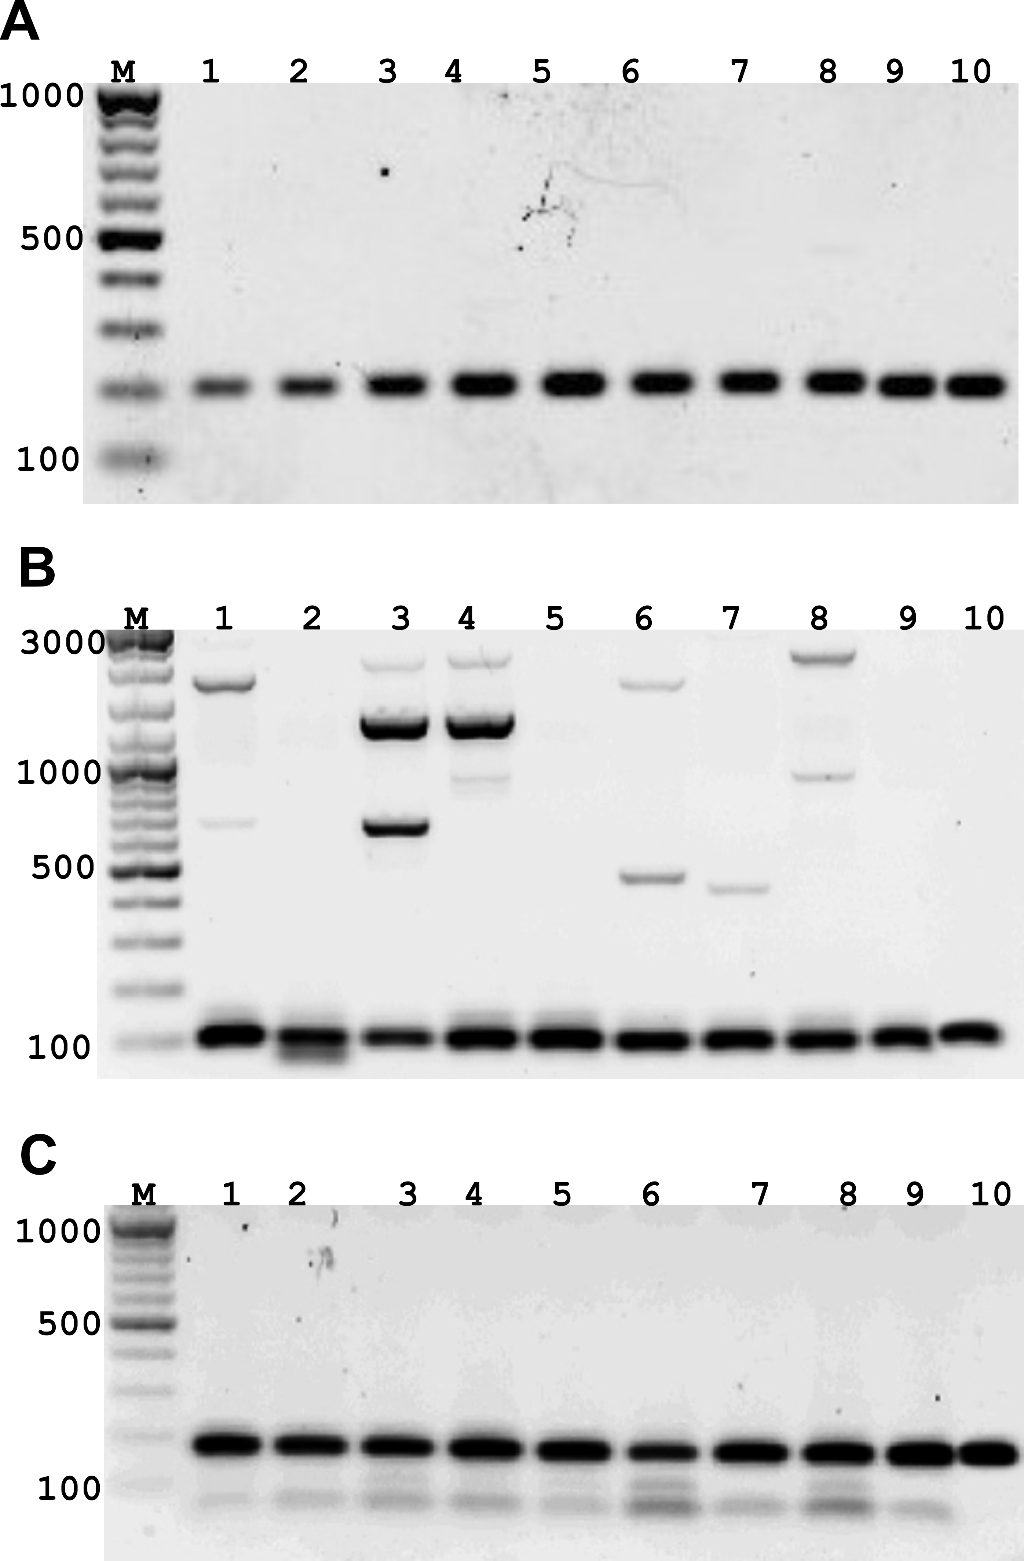
**

**Figure S4**. Amplification results of spring eDNA samples with genus-specific primers: А - Acibae_cytb, B - Aru, C - Acibae_CR (1-9: eDNA; 10: positive control of Russian sturgeon DNA).


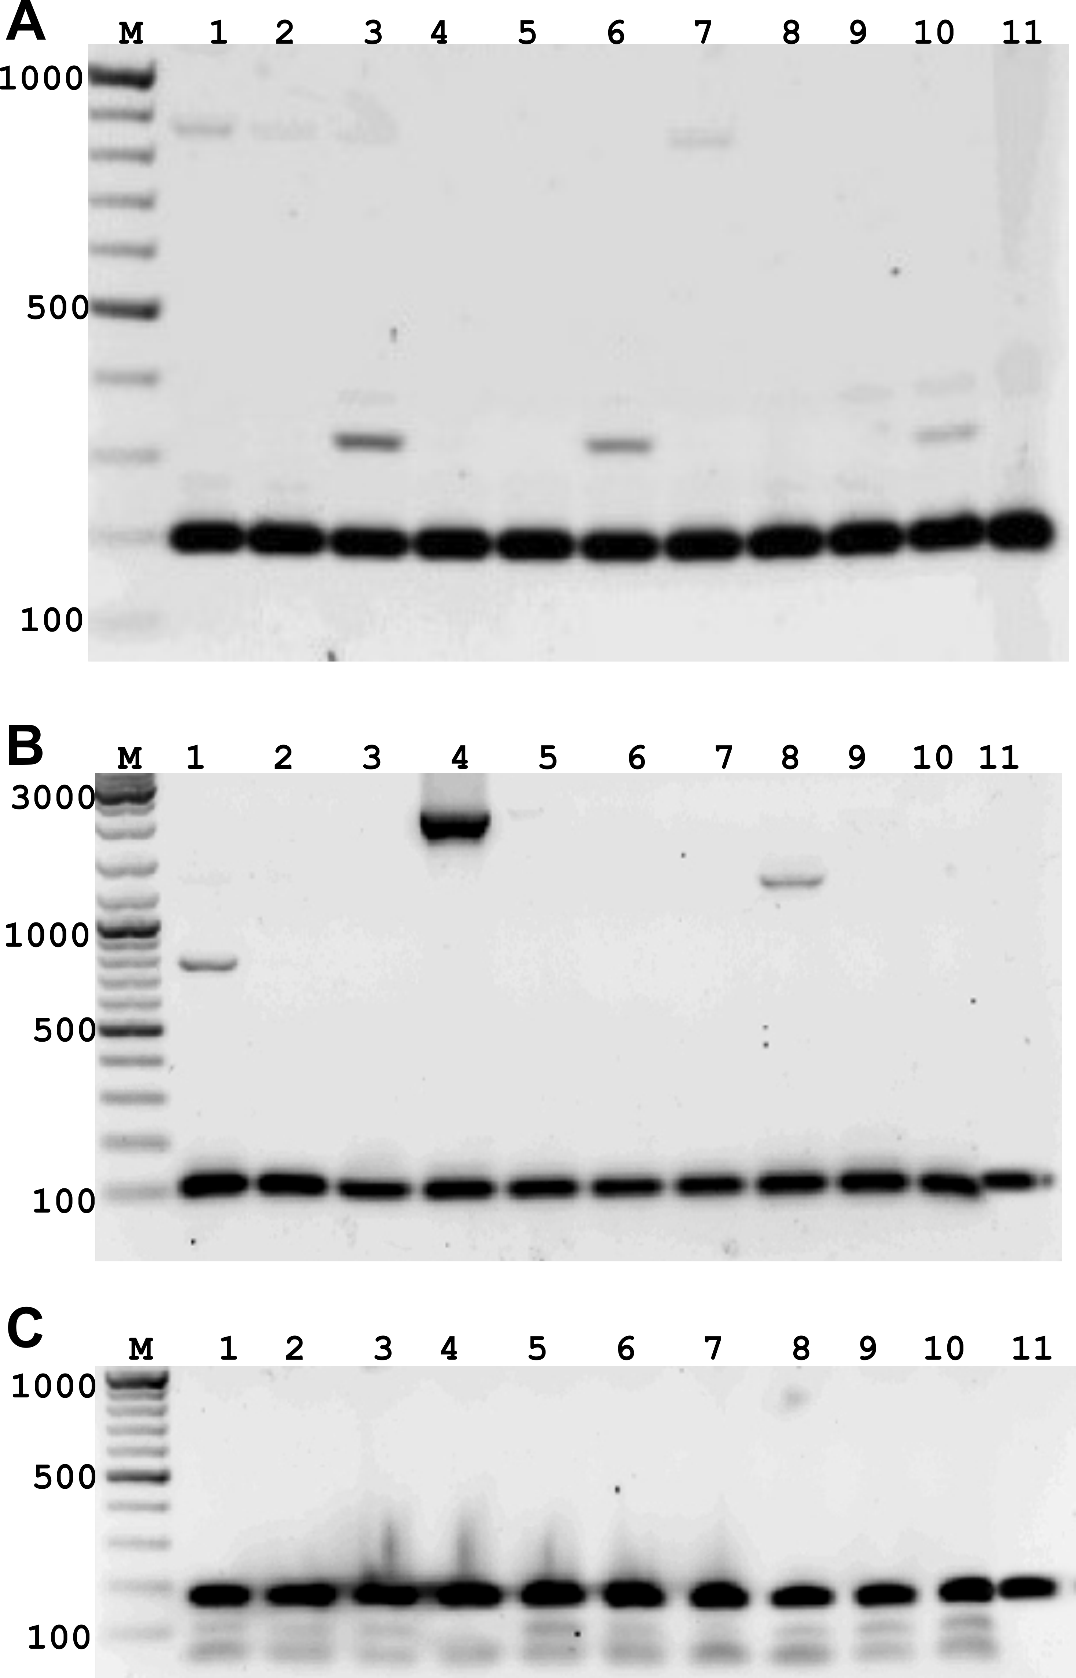


**Figure S5**. Amplification results of autumn eDNA samples with genus-specific primers: А - Acibae_cytb, B - Aru, C - Acibae_CR (1-9: eDNA; 10: positive control of Russian sturgeon DNA).
